# Supplementary material for: Innovation in microbial bioactive materials: electrospun ectoine/ε-PL/PVA fiber dressing as a bioactive and hemocompatible material with potential for wound healing applications
Source: Royal Society of Chemistry journal article supplement (doi:10.1039/d5ra09550f), 2026-03-30
Supplement: d5ra09550f1.pdf [file d5ra09550f1.pdf]

Supplementary data for reviewer

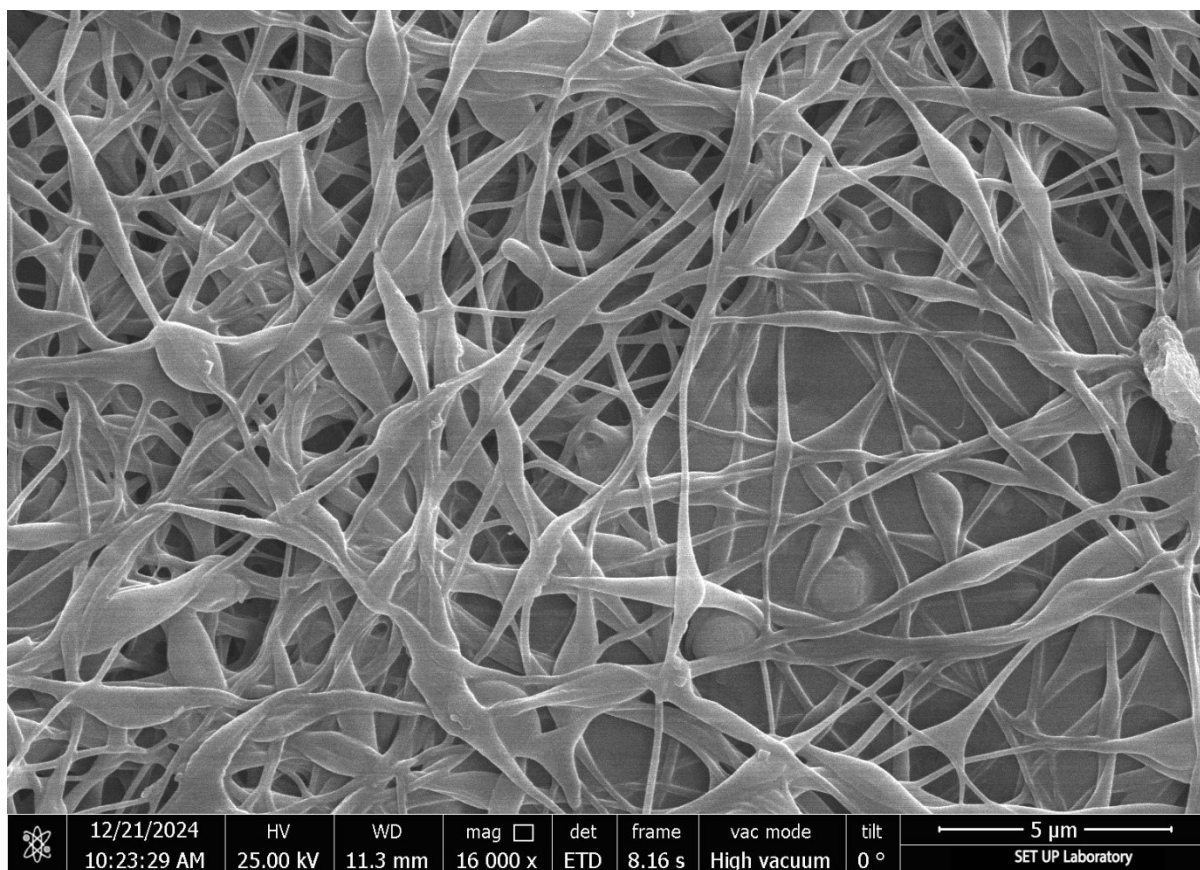

Figure S1. The FE-SEM image of PVA.

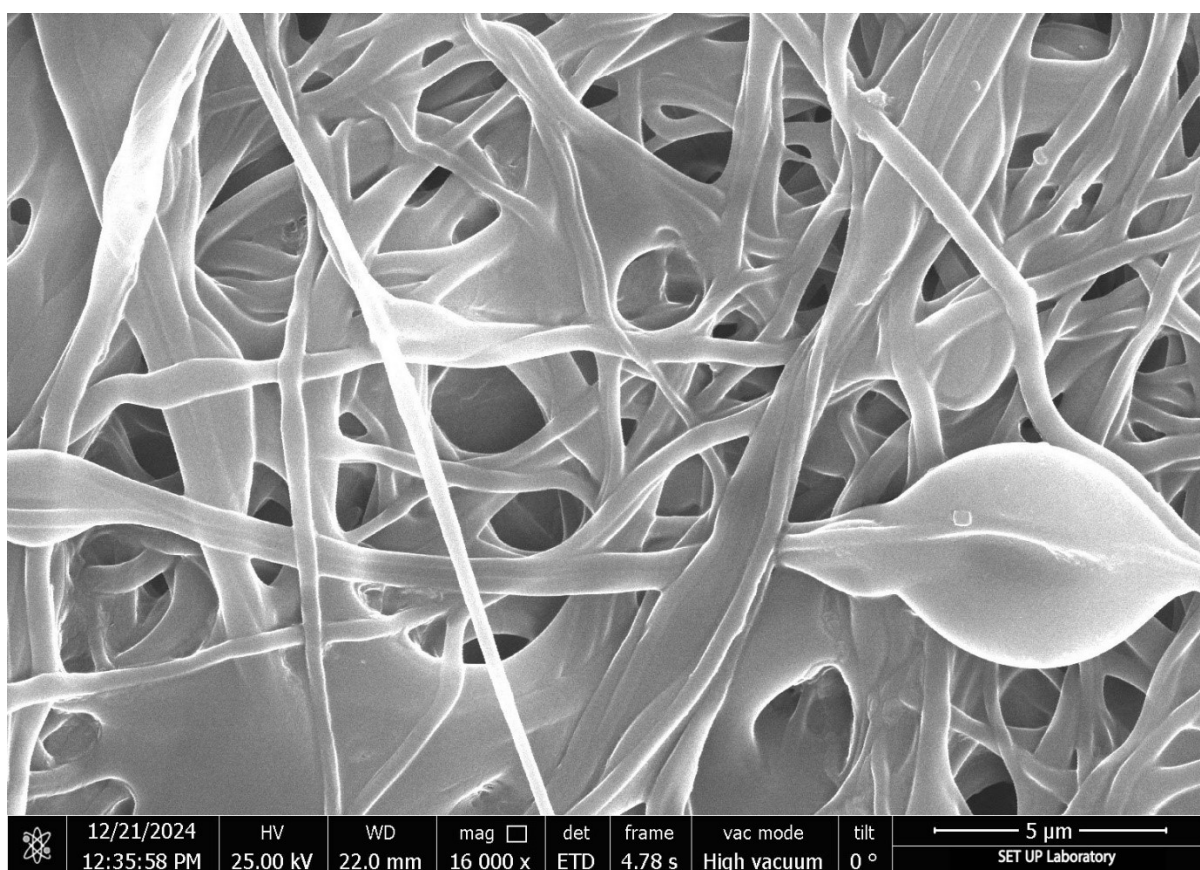

Figure S2. The FE-SEM image of PVA- $\epsilon$ -PL.

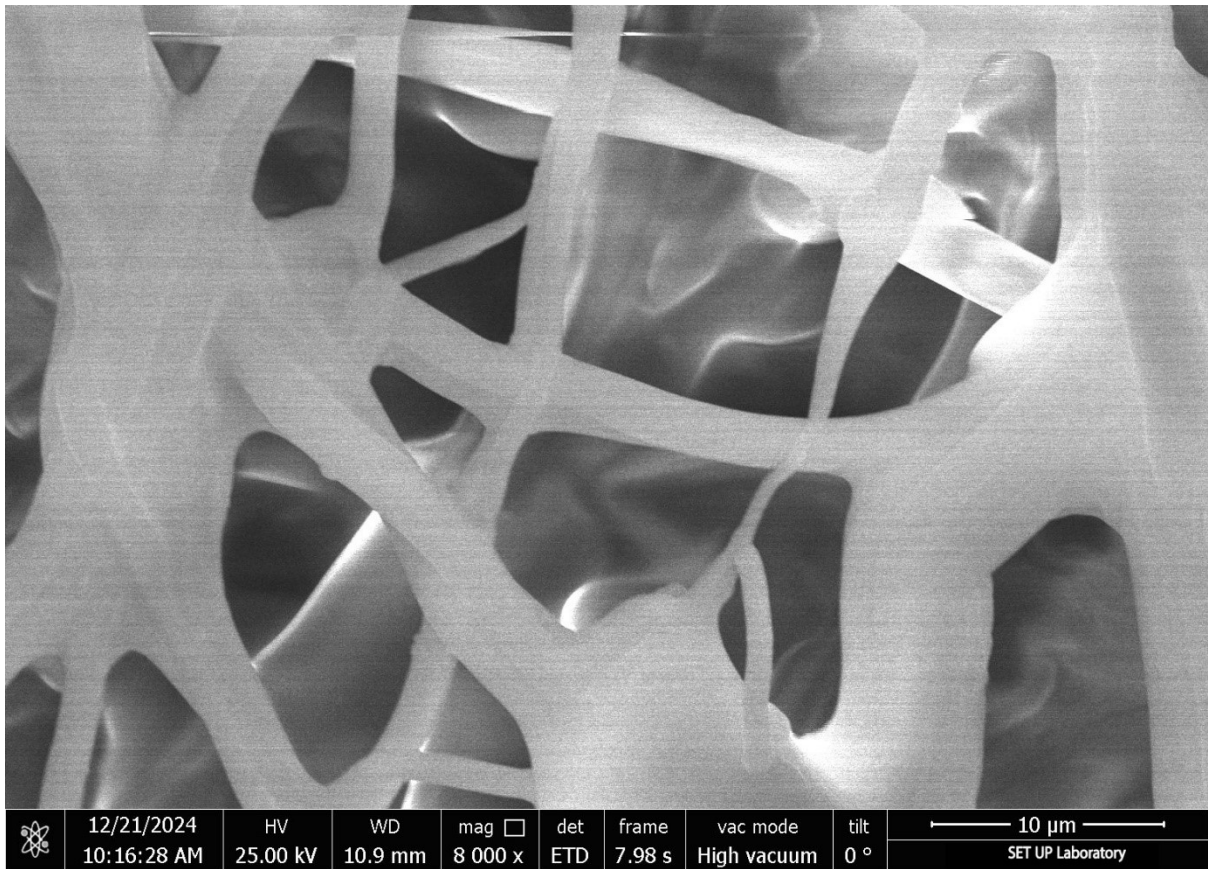

Figure S3. The FE-SEM image of PVA-ECT.
